# Supplementary material
Source: PubMed Central journal article supplement (PMC4503655)
Supplement: 14_264_Chinnasamy_Suppl.pdf [file 14_264_Chinnasamy_Suppl.pdf]

# Loss of Allograft Inflammatory Factor-1 Ameliorates Experimental Autoimmune Encephalomyelitis by Limiting Encephalitogenic CD4 T-Cell Expansion

Prameladevi Chinnasamy,<sup>1,2</sup> Sarah E Lutz,<sup>3\*†</sup> Dario F Riascos-Bernal,<sup>1,2\*</sup> Venkatesh Jeganathan,<sup>4</sup> Isabel Casimiro,<sup>1,2‡</sup> Celia F Brosnan,<sup>3</sup> and Nicholas ES Sibinga<sup>1,2,5</sup>

Online address: <http://www.molmed.org>

The Feinstein Institute  
for Medical Research North  
Shore LIJ  
Empowering Imagination. Pioneering Discovery.®

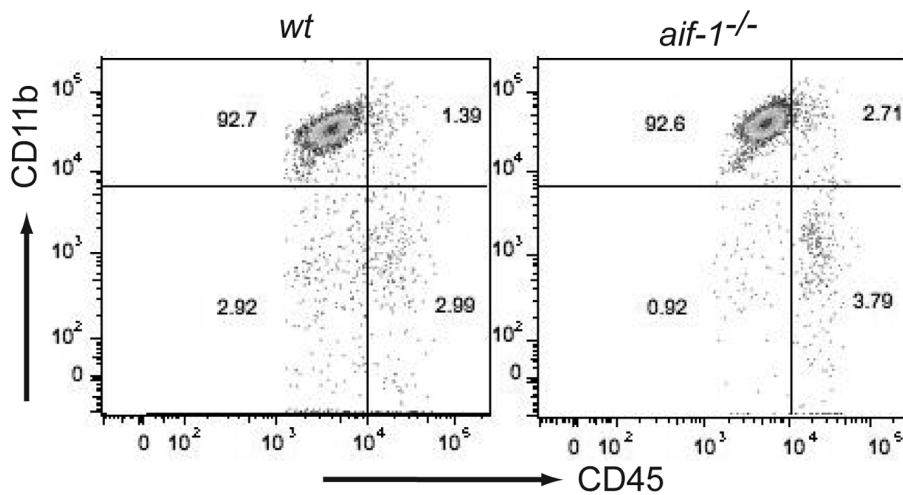

**Supplementary Figure S1.** Loss of Aif-1 does not affect the resident microglial population at baseline. Representative FACS data of the resident microglial population (CD45<sup>low</sup>CD11b<sup>+</sup>) from spinal cords of *wt* and *aif-1*<sup>-/-</sup> naïve mice.

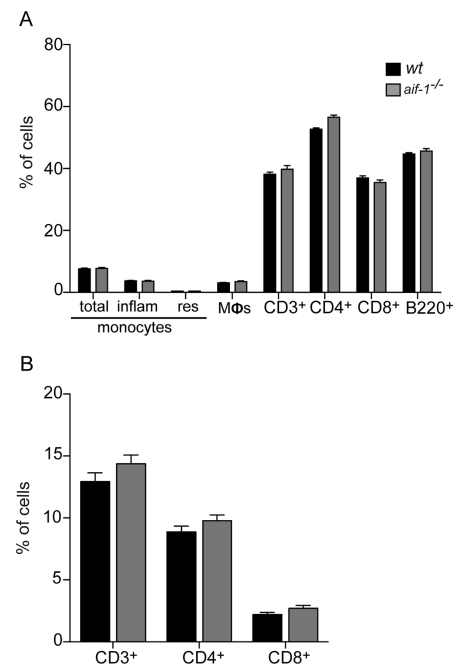

**Supplementary Figure S2.** *Aif-1*<sup>-/-</sup> mice display normal immune cell subset populations at baseline. (A) Monocyte lineage (total (CD11b<sup>+</sup>); inflammatory (CD11b<sup>+</sup>Gr1<sup>+</sup>); resident (CD11b<sup>+</sup>Gr1<sup>+</sup>); and macrophage (MΦs, CD11b<sup>+</sup>F4/80<sup>+</sup>)), T cell lineage (CD3<sup>+</sup>; CD3<sup>+</sup>CD4<sup>+</sup>; CD3<sup>+</sup>CD8<sup>+</sup>) and B cell lineage (CD3<sup>-</sup>B220<sup>+</sup>) cells from *wt* and *aif-1*<sup>-/-</sup> naïve mouse spleens. (B) T cell subsets (CD3<sup>+</sup>CD4<sup>+</sup>; CD3<sup>+</sup>CD8<sup>+</sup>) from *wt* and *aif-1*<sup>-/-</sup> naïve mouse thymi (n = 4). Data are represented as mean ± SEM.

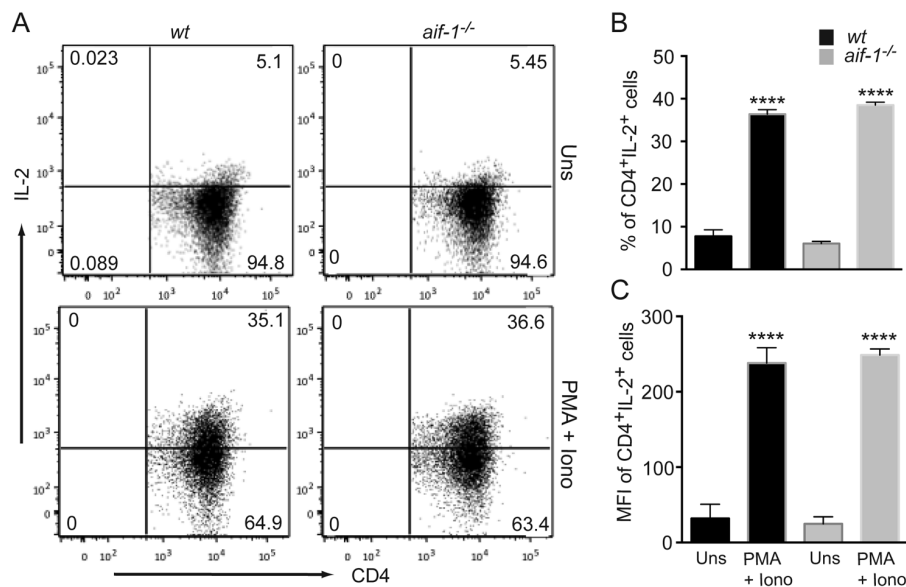

**Supplementary Figure S3.** *Aif-1*-deficient CD4 T cells show similar activation by Phorbol 12-myristate 13-acetate (PMA) and ionomycin (Iono). (A) Representative FACS data, (B) quantification of the percentage of CD4 T cells expressing IL-2 (CD4<sup>+</sup>IL-2<sup>+</sup>), and (C) mean fluorescent intensity (MFI) of CD4 T cells expressing IL-2 (CD4<sup>+</sup>IL-2<sup>+</sup>) from spleens of *wt* (n = 3) and *aif-1*<sup>-/-</sup> (n = 4) mice. Uns, unstimulated. Data are represented as mean ± SEM. \*\*\*\*, P < 0.0001 vs. unstimulated.

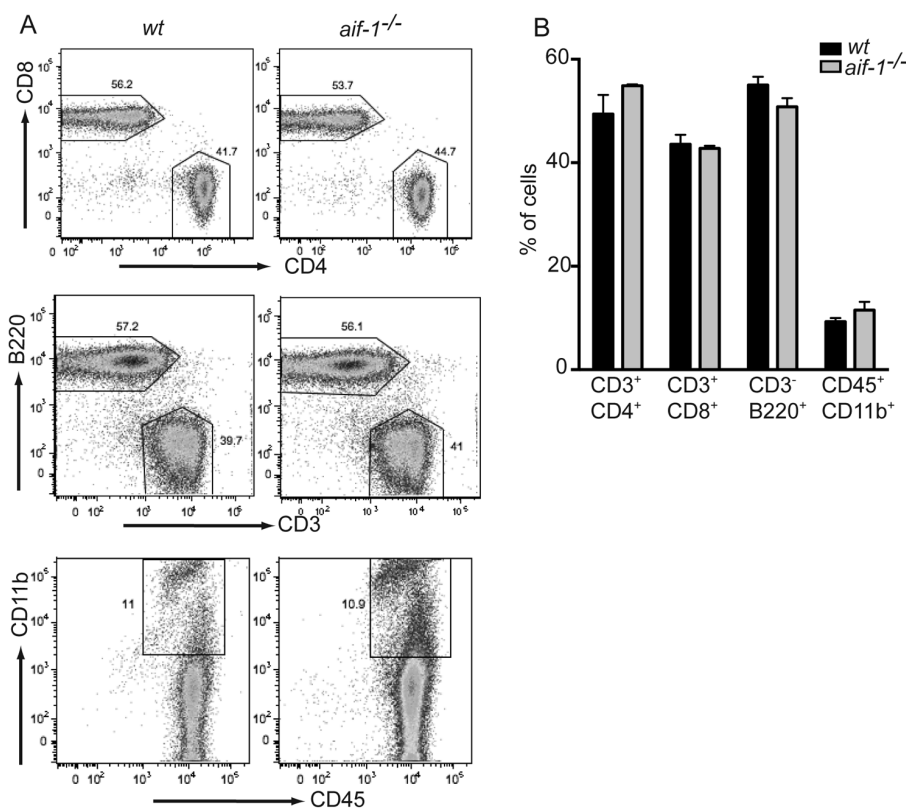

**Supplementary Figure S4.** *Aif-1* deficiency does not affect lymph node immune cell subsets after MOG<sub>35-55</sub> immunization. (A) Representative FACS data of effector T cells (CD3<sup>+</sup>CD4<sup>+</sup>; CD3<sup>+</sup>CD8<sup>+</sup>), B cells (CD3<sup>+</sup>B220<sup>+</sup>), and monocytes (CD45<sup>+</sup>CD11b<sup>+</sup>) from lymph nodes of d-16 EAE *wt* and *aif-1*<sup>-/-</sup> mice. (B) Quantification of T cell subsets, B cells, and monocytes (n = 6). Data are represented as mean ± SEM.

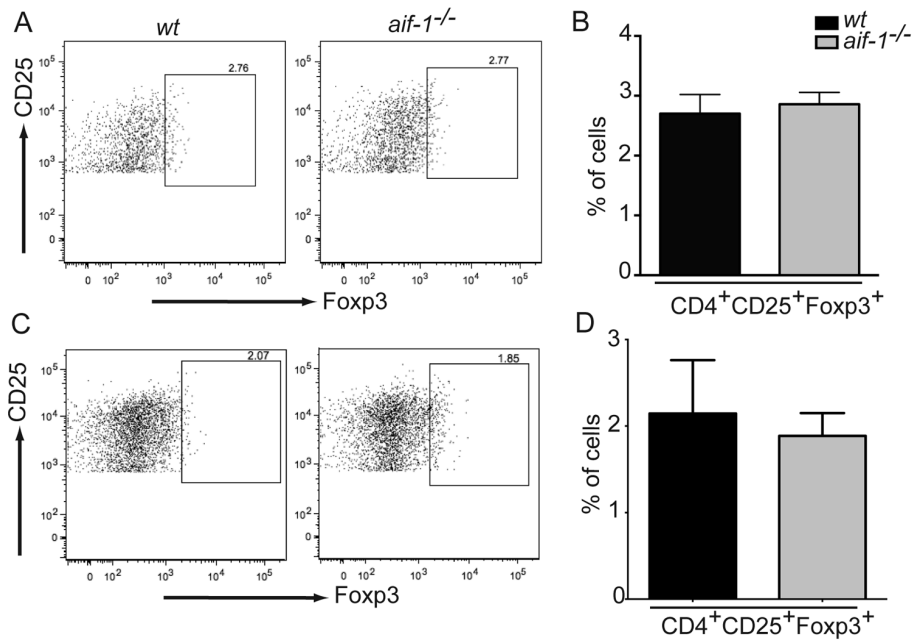

**Supplementary Figure S5.** Loss of Aif-1 does not affect iTreg subsets after MOG<sub>35-55</sub> immunization. Representative FACS data for iTreg cells (CD4<sup>+</sup> CD25<sup>+</sup> Foxp3<sup>+</sup>) from spleen (A, quantified in B) and lymph nodes (C, quantified in D) (n = 6).
